# Supplementary material for: Effective construction of a CuCo MOF@graphene functional electrocatalyst for hydrogen evolution reaction
Source: Royal Society of Chemistry journal article supplement (doi:10.1039/d3dt01477k), 2023-01-01
Supplement: d3dt01477k1.pdf [file d3dt01477k1.pdf]

## **Effective Construction of the CuCo MOF@Graphene Functional Electrocatalyst for Hydrogen Evolution Reaction**

Yang Song<sup>\*a</sup>, Huiyi He<sup>b</sup>, Yangyang Zhao<sup>a</sup>, Ying Li<sup>\*a</sup>, Mingzhu Wu<sup>a</sup>, Jing Li<sup>a</sup>, Xiangman Lu<sup>b</sup>,  
Lishuang Zhao<sup>b</sup>, Liguo Wei<sup>\*b</sup>

<sup>a</sup> Chemical Pollution Control Chongqing Applied Technology Extension Center of Higher  
Vocational Colleges, Chongqing Industry Polytechnic College, Chongqing, 401120, P. R. China

<sup>b</sup> College of Environmental and Chemical Engineering, Heilongjiang University of Science and  
Technology, Harbin 150022, P. R. China.

Yang Song

School of Chemical and Pharmaceutical Engineering

Chongqing Industry Polytechnic College, Chongqing, 401120, P. R. China

Fax: +86-023-61879390

E-mail: songyang@cqipc.edu.cn

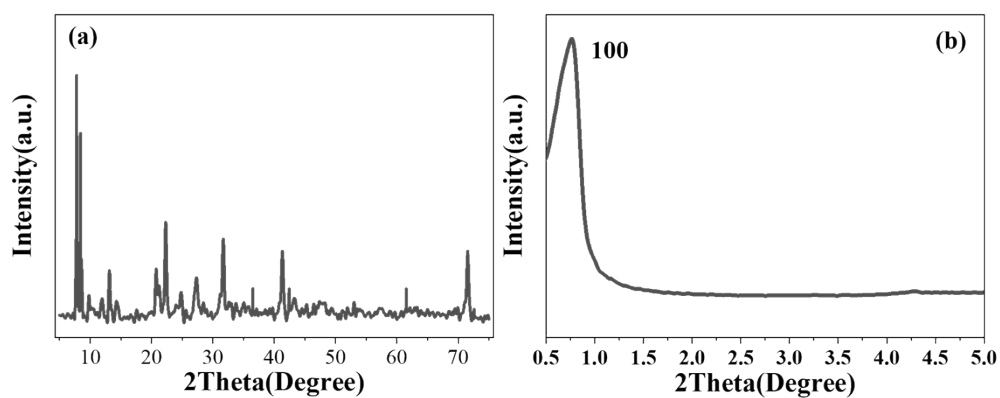

Fig.S1 CuCoOC@rGO composite precursor before carbonization: (a) XRD pattern; (b) Small-angle XRD patterns.

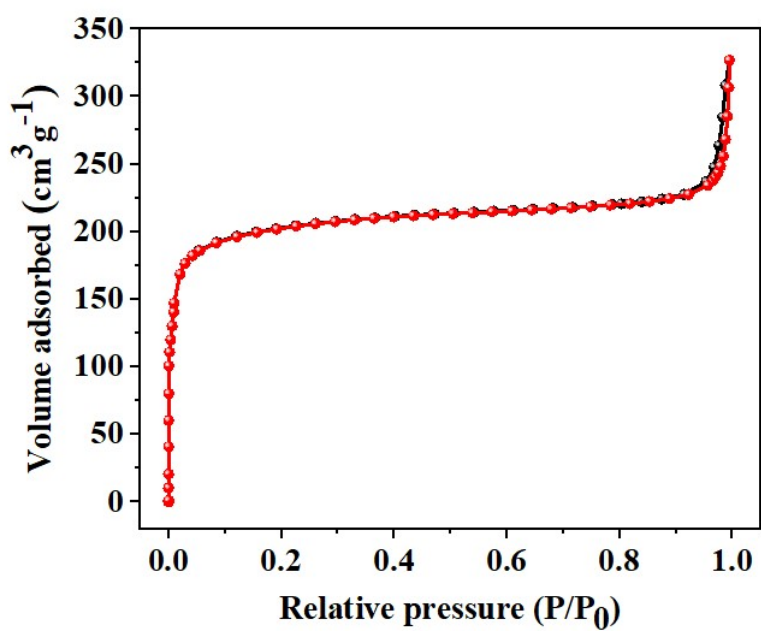

Fig.S2 N<sub>2</sub> adsorption-desorption isotherms of CuCoOC@rGO.

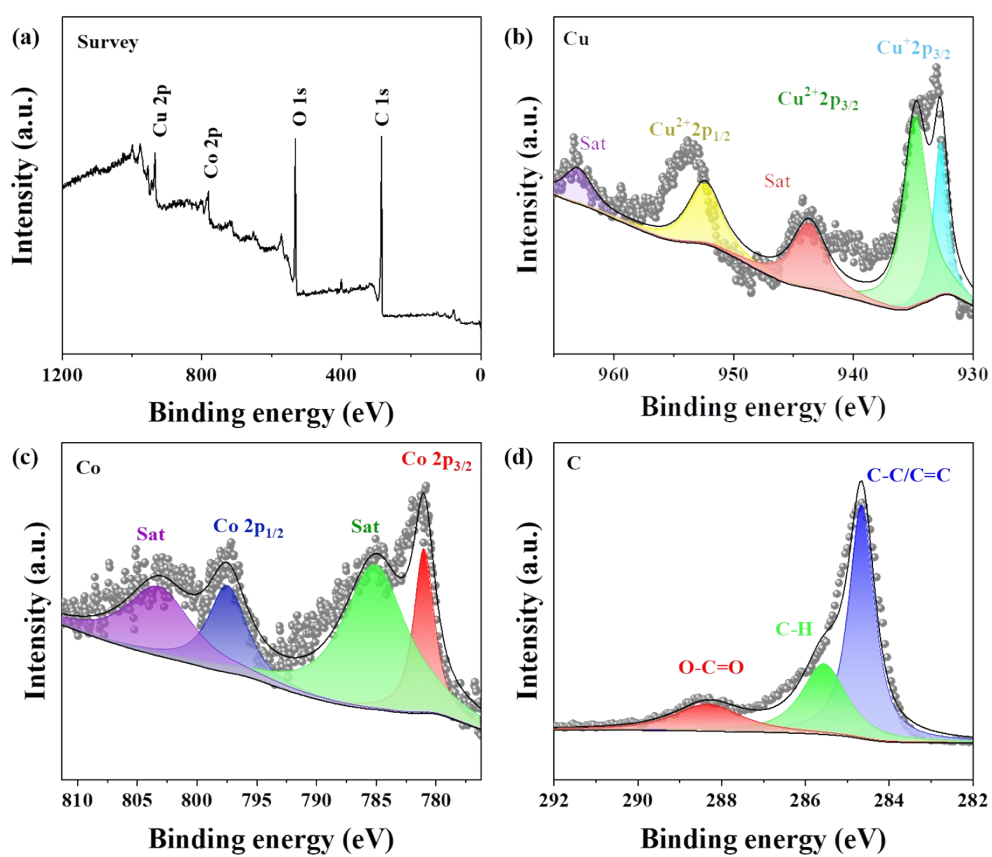

**Fig.S3** High-resolution XPS spectra of (a) survey, (b) Cu 2p, (c) Co 2p and (d) C for CuCoOC@rGO after a durability test for 30 h.
